# Supplementary material for: Gut microbiota and acylcarnitine connect the beneficial association between estrogen and lipid metabolism disorders in ovariectomized mice
Source: Research Square preprint supplement (doi:10.21203/rs.3.rs-2286266/v1), 2022-12-01
Supplement: Supplementary file 1 [file 949a9aa9f0e50888e7ab15bd.xlsx]

## Sheet: Sheet1
Table S1. Ingredients of the experimental diets.
Ingredient composition (% DM)	GM%	Kcal%
Protein	20	20.3
Carbohydrate	64	63.9
Fat	7	15.8
Total		100
kcal/gm	3.9
